# Supplementary material for: Low-intensity pulsed ultrasound therapy suppresses coronary adventitial inflammatory changes and hyperconstricting responses after coronary stent implantation in pigs in vivo
Source: PLoS One. 2021 Sep 13;16(9):e0257175. doi: 10.1371/journal.pone.0257175 (PMC8437271; doi:10.1371/journal.pone.0257175)
Supplement: S1 Data — (XLSX) [file pone.0257175.s011.xlsx]

## Sheet: LAD % change
LIPUS		control	5HT10	5HT100	HF90-5HT100	HF300-5HT100	HF90	HF300		control	Nitroglycerin	Bradykinin	BK. after L-NMMA
1	LIPUS1-proxy	0	-13.5135	-11.2613	-16.6667	-3.15315	1.8018	-0.45045		0	18.7843	12.8824	6.43137
1	LIPUS1-distal	0	-3.82514	-23.4973	-22.4044	-6.01093	-3.82514	-2.18579		0	8.79121	6.3956	9.89011
1	LIPUS2-proxy	0	-10.1974	-15.4605	1.97368	-2.63158	9.53947	-3.28947		0	12.2041	11.5034	4.80272
1	LIPUS2-distal	0	10.2459	2.86885	9.42623	-2.45902	8.19672	7.78689		0	15.367	3.24719	15.8577
0	LIPUS3-proxy	0	-9.14286	-2.51046	-14.2857	-10.8571	20	14.2857		0	33.9286	7.14286	17.0714
0	LIPUS3-distal	0	-28.1046	-2	-27.451	-1.96078	13.7255	2.61438		0	27.377	15.7049	14.5246
0	LIPUS4-proxy	0	-13.3117	-21.7228	-10.1948	-6.16883	7.46753	-2.92208		0	8.09319	4.6595	-2.58423
0	LIPUS4-distal	0	1.90476	-26.8085	-8.09524	5.2381	-3.33333	1.42857		0	5.40426	2.12766	5.25532
1	LIPUS5-proxy	0	-11.4907	-20	-15.2174	-12.7329	-9.00621	-4.65839		0	1.6129	9.09677	13.871
1	LIPUS5-distal	0	-9.33333	-41.1765	-22.2222	3.11111	12.8889	-1.77778		0	-0.321543	3.92926	-6.43087
0	LIPUS6-proxy	0	-48.731	-23.6413	-31.9797	41.1168	28.4264	20.3046		0	9.51471	-4.10294	7.25
0	LIPUS6-distal	0	-55.5556	-7.42358	-45.7488	12.0773	-32.3671	-14.4928		0	8.14035	1.63158	3.50877
1	LIPUS7-proxy	0	-9.32945	-16.2338	-19.7376	-7.58017	-9.91254	-10.2041		0	26.7278	-3.91743	4.28135
1	LIPUS7-distal	0	-11.9048	-4.28571	-9.36508	5.95238	-12.3016	-17.8571		0	3.90625	3.78125	0.390625
0	LIPUS8-proxy	0	-11.6183	-12.9139	-19.0871	2.90456	8.71369	0.414938		0	6.56274	11.0266	23.251
0	LIPUS8-distal	0	-6.00858	-22.9358	-25.3219	-18.4549	-13.3047	3.43348		0	3.92308	0	11.7692
1	LIPUS9-proxy	0	7.11297	-26.7081	4.60251	14.2259	-1.25523	25.9414		0	2.85714	-0.285714	-2.57143
1	LIPUS9-distal	0	-1	-1.33333	0.5	-8.5	7.5	3		0	3.3033	-2.4024	0.702703
0	LIPUS10-proxy	0	-17.9775	-21.3542	-13.3633	-0.374532	0	-8.61423		0	2.30395	5.77508	6.16717
0	LIPUS10-distal	0	-17.8723	-51.4124	-18.9362	-11.9149	-0.425532	-8.08511		0	14.1124	13.1086	8.86517
1	LIPUS11-proxy	0	-32.0652	-32.4873	-18.2065	-14.6739	-15.3804	-5.21739		0	-0.303951	7.77508	5.16717
1	LIPUS11-distal	0	-11.7904	-58.9372	-12.2271	0.436681	-9.60699	11.3537		0	10.1124	17.1086	7.86517
1	LIPUS12-proxy	0	5.29801	-19.5335	-1.98675	-18.2119	-2.31788	-7.94702		0	12.0588	12.8824	7.29412
1	LIPUS12-distal	0	-5.9633	-10.7143	-10.5505	-3.66972	-7.33945	-2.29358		0	5.78512	3.23967	2.3719
0	LIPUS13-proxy	0	-28.125	-3.05344	-3.125	11.4583	17.1875	25.5208		0	1.67364	-1.25523	17.6444
0	LIPUS13-distal	0	-11.2994	6.86275	-18.6441	-3.9548	13.5593	20.339		0	1.80995	9.50226	-3.52489
1	LIPUS14-proxy	0	-6.87023	-29.8755	-9.92366	1.14504	17.9389	17.5573		0	4.13793	13.6897	2.48276
1	LIPUS14-distal	0	-8.82353	-31.7597	-7.84314	-7.84314	15.6863	3.43137		0	0.840336	18.2857	22.5882
0	LIPUS15-proxy	0	-23.8636	-35.9848	-20.8333	-13.6364	-10.6061	-4.54545		0	2.74074	-5.18519	-4.18519
0	LIPUS15-distal	0	-41.2556	-33.1839	-26.009	-29.148	-8.96861	-10.7623		0	5.44828	10.7759	-3.31034
0	LIPUS16-proxy	0	-18.3474	-38.5348	-22.3468	-10.3782	-6.23568	-4.90158		0	17.493	4.69484	12.2676
0	LIPUS16-distal	0	-21.2635	-37.7323	-20.0861	-17.9821	-5.26734	-7.36323		0	8.09137	12.1827	7.07614

## Sheet: LCx % change
LIPUS		control	5HT10	5HT100	HF90-5HT100	HF300-5HT100	HF90	HF300
1	LIPUS1-proxy	0	-6.21	-5.98	2.32	-0.11	-0.05	1.5
1	LIPUS1-distal	0	-5.39	-6.99	0.22	-1.37	0.44	0.22
1	LIPUS2-proxy	0	-4.66	-1.62112	3.41615	0.310559	2.17391	6.8323
1	LIPUS2-distal	0	-1.79	-9.8853	-1.07527	-4.30108	5.73477	1.79211
0	LIPUS3-proxy	0	-6.96	-6.11392	-3.16456	-6.01266	-11.3924	-2.21519
0	LIPUS3-distal	0	8.47	-6.26357	3.87597	3.10078	3.48837	7.36434
0	LIPUS4-proxy	0	-10.43	-14.4498	-12.0482	1.20482	-4.01606	-2.81124
0	LIPUS4-distal	0	-1.44	-6.78469	-12.4402	-0.478469	-4.78469	0.956938
1	LIPUS5-proxy	0	-5.39	-4.0202	-0.3367	3.7037	-1.0101	-3.7037
1	LIPUS5-distal	0	-11.72	-14.069	-1.37931	-6.2069	1.37931	-3.7931
0	LIPUS6-proxy	0	0.86	2.74138	9.91379	7.75862	7.75862	-4.31034
0	LIPUS6-distal	0	-8.56	-1.0929	1.63934	1.0929	5.46448	2.73224
1	LIPUS7-proxy	0	-4.95	0.605863	-3.90879	6.18893	1.30293	2.60586
1	LIPUS7-distal	0	-2.42	-10.7866	-2.51046	-12.1339	-4.1841	-1.67364
0	LIPUS8-proxy	0	1.89	-6.16667	-4.16667	-3.78788	9.09091	1.13636
0	LIPUS8-distal	0	2.87	-4.45902	8.03279	-1.22951	13.5246	3.27869
1	LIPUS9-proxy	0	-3.81	-5.80952	-0.952381	-1.5873	-0.31746	-2.22222
1	LIPUS9-distal	0	-2.04	-10.1633	-4.42177	0.680272	-2.72109	-3.06122
0	LIPUS10-proxy	0	-3.45	-6.89	-2.57	-1.66	3.43	-0.21
0	LIPUS10-distal	0	-4.32	-5.43	-0.98	-0.32	2.14	0.43
1	LIPUS11-proxy	0	2.22	-11.33	-2.55	-1.44	3.21	-1.14
1	LIPUS11-distal	0	-3.23	-7.09	-2.01	-0.98	-0.98	-1.67
1	LIPUS12-proxy	0	5.56	-3.74	-3.45	-2.46	-1.29	0.76
1	LIPUS12-distal	0	-1.87	-4.65	-1.13	-1.06	0.11	0.48
0	LIPUS13-proxy	0	-5.34	-3.65	-0.54	0.76	-0.23	0.42
0	LIPUS13-distal	0	-1.53	-5.22	-1.03	-0.55	1.14	1.06
1	LIPUS14-proxy	0	-8.45	-7.56	-3.57	-2.58	0.33	-2.14
1	LIPUS14-distal	0	-7.56	-8.43	-1.09	-3.42	0.54	-1.13
0	LIPUS15-proxy	0	3.62	-7.15	0.24	1.21	3.72	1.89
0	LIPUS15-distal	0	5.05	-4.33	-2.04	2.44	2.67	0.65
0	LIPUS16-proxy	0	1.32	-3.56	-0.76	-0.33	4.11	0.54
0	LIPUS16-distal	0	0.45	-6.34	-0.68	0.18	2.17	1.34

## Sheet: Immunohistology & Histology
pig number	LIPUS	state	eNOS	LYVE1	VEGF-C	VEGFR3	IL-1β	CD68	ROCK1	ROCK2	pMYPT1	Lumen diameter	Intimal+medial thickness	Intimal+medial area	Adventitial area	vWF	VEGF-A	VEGFR2	LYVE-1 wall	Vasa Vasorum wall	Adipocyte	Adiponectin
			/mm2	/mm2	/mm2	/mm2	/HPF	/HPF	grade	grade	grade	mm	mm	mm2	mm2	/mm2	/mm2	/mm2	µm	µm	µm	%
1	1	proximal	15.1877	14.2865	66.5364	33.9914	38.2715	46.2665	2.33333	1.75	2.08333	1.69343	0.110323	1.50532	1.3827	64.2893	25.3128	27.4824	0.90125	2.50406	48.5708	7.695
	1	distal	16.8325	16.4451	74.261	59.4088	50.0383	61.2361	2.58333	1.66667	2	1.27849	0.100402	1.02472	1.00995	75.3734	60.399	30.6946	0.80225	2.30119	50.2282	8.145
2	1	proximal	17.2757	11.761	48.3719	33.9755	31.3695	37.9056	2.16667	1.66667	1.66667	1.88264	0.194907	2.97928	1.73655	35.2831	18.4274	17.8515	1.17512	2.54094	39.731	8.545
	1	distal	19.7357	14.224	72.5993	48.6345	45.1526	55.4621	1.66667	2	2.25	1.57028	0.140222	2.0004	1.41875	41.1747	23.26	26.0794	1.08563	2.65975	43.6377	8.325
3	0	proximal	16.238	7.34238	60.4415	43.3014	37.0284	46.9238	2.5	1.83333	2.41667	1.68402	0.110571	1.54708	1.10851	39.8587	72.169	38.7908	1.19969	2.80044	55.5871	6.05
	0	distal	18.0217	15.065	55.9623	41.7346	37.5873	45.0947	2.91667	2.41667	2.33333	1.06841	0.132221	1.134	1.05428	42.8773	69.2414	11.3822	1.12875	2.15888	46.2283	6.09
4	0	proximal	8.0253	10.6039	36.1139	24.5775	23.7651	28.1521	2.16667	2.33333	1.66667	1.96058	0.206008	2.72367	1.99369	41.2374	18.5585	21.0664	1.05313	2.69638	49.3744	5.405
	0	distal	13.6958	11.7668	54.7832	38.3482	34.9661	42.6992	2.83333	1.33333	1.91667	1.54964	0.131699	1.46086	1.09523	53.4856	61.1745	25.5655	1.04856	2.71544	48.5994	6.65
5	1	proximal	13.137	15.24	42.5638	34.1561	30.6533	35.7911	2.08333	1.75	1.83333	1.95356	0.230638	2.84631	1.90302	48.6507	26.7994	17.8663	1.06987	2.70938	41.5639	8.485
	1	distal	20.3104	12.2225	63.0323	48.3247	41.1932	50.8501	1.83333	1.5	1.75	1.61	0.16559	1.87069	1.42784	29.8772	43.4222	22.4115	1.25006	2.43669	43.3104	7.12
6	0	proximal	8.48081	8.71996	35.6194	21.202	21.8471	26.2228	1.66667	2.25	2.25	1.33916	0.233186	2.15529	2.35827	56.0569	24.1703	16.1135	1.15712	2.57437	52.5303	7.03
	0	distal	12.0287	6.04377	60.1437	37.5014	34.5629	44.0693	2.75	1.83333	2.41667	1.26112	0.15752	1.40511	1.41328	89.1456	33.2559	28.3029	1.16425	2.64206	51.0172	5.365
7	1	proximal	13.868	8.62556	47.7675	35.954	30.7824	38.168	2.08333	1.83333	2.25	2.64825	0.190542	3.09243	1.94693	55.6349	28.7632	11.8135	1.23856	2.08694	46.9417	8.955
	1	distal	19.7101	10.917	63.2081	45.537	39.8874	49.5442	1.25	1.91667	2.08333	2.16556	0.152087	1.92198	1.47133	77.0256	38.0608	21.749	0.909312	2.15537	52.4408	8.6
8	0	proximal	6.21571	6.43883	31.0786	21.9622	19.8265	24.2891	2.25	2.41667	2.33333	2.937	0.141935	2.69491	2.41324	71.3224	19.8903	15.3321	1.34363	2.52731	51.7403	5.07
	0	distal	11.2423	10.9703	55.4087	40.1512	35.5101	43.69	2.25	2.16667	2.66667	2.23694	0.095104	1.26725	1.24529	79.7842	43.3633	28.1059	0.906438	2.24344	52.1335	7.31
9	1	proximal	14.6116	11.5355	38.4516	30.3768	26.788	31.8721	2.16667	1.66667	1.75	1.66787	0.260362	3.03527	2.60067	32.6839	16.1497	10.3819	0.912625	2.61275	46.8954	6.96
	1	distal	19.9548	11.5124	75.2141	42.212	42.9795	53.4686	2.16667	1.33333	2.25	1.5199	0.149241	1.61474	1.30295	76.7491	33.0021	13.8148	0.975375	2.22613	41.6609	7.95
10	0	proximal	16.9945	5.43824	44.1857	29.2305	26.2848	33.2337	1.91667	1.66667	1.66667	2.30138	0.172752	1.6305	1.47106	89.7309	49.6239	20.3934	1.25625	2.86275	43.6332	5.36
	0	distal	15.6236	7.81181	49.2144	28.1225	28.3829	35.2399	2.16667	2.08333	2.5	2.04297	0.106523	1.27399	1.28011	85.9299	20.3107	21.8731	1.2205	2.3445	47.7471	5.745
11	1	proximal	8.39812	10.3741	50.8827	34.5805	31.9458	39.1363	1.91667	1.66667	2.41667	1.97382	0.104425	2.147	2.02426	77.0651	36.5565	27.1704	1.2885	2.72562	41.6919	6.72
	1	distal	23.5947	15.0148	85.799	66.4942	55.7694	69.3542	1.41667	1.91667	1.66667	2.11731	0.0978395	1.20216	0.932412	105.104	48.2619	34.3196	0.83675	2.20275	40.3608	7.565
12	1	proximal	19.9806	12.7149	80.8306	52.6762	48.7406	60.7491	1.5	1.41667	2.33333	2.1217	0.103921	1.32649	1.10107	54.4926	33.6038	31.7873	1.23012	2.39213	45.132	7.97
	1	distal	21.9877	14.6585	78.5276	71.1983	54.7948	68.1736	1.66667	2.16667	2.25	2.11852	0.103709	1.4116	0.955078	87.9509	54.4458	34.5521	0.83605	2.56838	41.6845	8.69
13	0	proximal	17.8525	7.51685	67.6517	48.8595	41.3427	52.618	2.33333	2.33333	2.41667	2.76772	0.0929907	1.71905	1.06428	76.1081	44.1615	51.6784	1.14938	2.16712	51.8137	5.575
	0	distal	14.7843	7.39217	74.9777	36.9608	39.7769	50.5718	2.75	2.41667	2.5	2.02588	0.0736393	1.10716	0.946948	112.995	34.8488	38.0169	1.15562	2.32525	50.7968	5.99
14	1	proximal	19.15	11.7846	72.1809	47.1386	43.7014	54.3403	2.83333	1.58333	2	2.35271	0.150343	2.32405	1.3577	63.3425	52.2944	32.4078	0.95605	2.59187	47.1111	7.815
	1	distal	28.0675	17.9632	78.5889	66.2392	54.2637	66.3639	1.33333	1.5	1.41667	2.05514	0.115267	1.23312	0.890711	71.8527	74.0981	43.7852	0.771875	2.15875	43.7778	7.125
15	0	proximal	17.6291	11.7527	66.1092	51.4183	43.0934	53.5403	2.41667	2.25	2.33333	1.33237	0.093101	1.783	0.680692	70.5165	42.6037	20.5673	0.9085	3.02675	54.9444	4.865
	0	distal	14.5007	15.819	73.822	56.6847	48.7752	59.7607	2.33333	1.75	2.16667	1.2076	0.157902	1.24233	0.758582	83.0497	52.73	48.7752	1.02	3.01262	55.3333	5.495
16	0	proximal	9.56709	7.17532	52.619	40.6601	33.4848	42.2547	2.83333	2.16667	2.66667	0.981653	0.166105	2.1115	0.8362	77.7326	35.8766	34.6807	1.3735	2.54263	60.8333	5.795
	0	distal	8.92447	7.64954	48.4471	35.6979	30.5982	38.2477	2.25	2.33333	2.25	0.858193	0.168373	1.0274	0.784361	72.6707	34.4229	14.0242	1.12387	2.3985	55.5	4.75

## Sheet: Lymph transport speed
Pig Number	LIPUS	Lymph transport speed
		mm/min
1	1	53.24
2	1	68.37
3	0	57.44
4	0	66.48
5	1	74.96
6	0	52.75
7	1	55.24
8	0	46.33
9	1	63.21
10	0	60.14
11	1	58.45
12	1	68.27
13	0	46.48
14	1	70.18
15	0	49.15
16	0	50.44

## Sheet: Stent & Vessel
pig number	LIPUS	state	Target Vessel diameter	Stent diameter	Stent length	overstretch ratio	Distal overstrech ratio	Maximum inflation pressure	strech stent diameter
1	1	proximal	2.43	2.5	16	1.11934		16	2.72
	1	distal	2.25	2.5	16		1.11111	11	2.5
2	1	proximal	2.61	2.5	16	1.02682		15	2.68
	1	distal	2.38	2.5	16		1.02101	10	2.43
3	0	proximal	3.12	3.5	16	1.07051		9	3.34
	0	distal	3.02	3.5	16		1.07285	8	3.24
4	0	proximal	3.09	3	16	1.02589		16	3.17
	0	distal	2.99	3	16		1.0602	16	3.17
5	1	proximal	3.1	3.5	16	1.07742		9	3.34
	1	distal	2.95	3.5	16		1.09831	8	3.24
6	0	proximal	2.42	2.75	16	1.09504		10	2.65
	0	distal	2.32	2.75	16		1.11207	9	2.58
7	1	proximal	3.07	3.5	16	1.05537		8	3.24
	1	distal	2.98	3.5	16		1.08725	8	3.24
8	0	proximal	2.93	3	16	1.08191		16	3.17
	0	distal	2.75	3	16		1.09455	12	3.01
9	1	proximal	2.65	2.5	16	1.04528		18	2.77
	1	distal	2.33	2.5	16		1.09442	12	2.55
10	0	proximal	2.99	3	16	1.03679		14	3.1
	0	distal	2.84	3	16		1.05986	12	3.01
11	1	proximal	3.02	3	16	1.04967		16	3.17
	1	distal	2.81	3	16		1.07117	12	3.01
12	1	proximal	3.08	3	16	1.01948		15	3.14
	1	distal	2.85	3	16		1.05614	12	3.01
13	0	proximal	2.65	2.75	16	1.09057		14	2.89
	0	distal	2.5	2.75	16		1.156	14	2.89
14	1	proximal	3.02	3	16	1.04967		16	3.17
	1	distal	2.8	3	16		1.02857	10	2.88
15	0	proximal	2.6	2.5	16	1		13	2.6
	0	distal	2.42	2.5	16		1.07438	13	2.6
16	0	proximal	2.75	2.5	16	1.00727		18	2.77
	0	distal	2.67	2.5	16		1.03745	18	2.77

## Sheet: Inter- & intra-observer
		Interobserver			Intraobserver
LIPUS		%	%		%	%
1	LIPUS1-proxy	18.65	18.91		18.85	18.45
1	LIPUS1-distal	8.77	8.8		8.6	8.94
1	LIPUS2-proxy	12.15	12.25		12.1	12.2
1	LIPUS2-distal	15.45	15.28		15.48	15.42
0	LIPUS3-proxy	34.13	33.73		34.9	34.96
0	LIPUS3-distal	26.78	27.98		26.38	26.78
0	LIPUS4-proxy	7.85	8.32		8.15	7.55
0	LIPUS4-distal	5.55	5.25		5.58	5.52
1	LIPUS5-proxy	1.7	1.51		1.65	1.75
1	LIPUS5-distal	-0.18	-0.46		-0.13	-0.23
0	LIPUS6-proxy	9.31	9.71		9.27	9.35
0	LIPUS6-distal	8.26	8.02		8.22	8.3
1	LIPUS7-proxy	27.45	26		29.35	29.55
1	LIPUS7-distal	3.84	3.98		3.94	3.74
0	LIPUS8-proxy	6.52	6.58		6.55	6.49
0	LIPUS8-distal	3.76	4.08		3.7	3.82
1	LIPUS9-proxy	3	2.71		3.03	2.97
1	LIPUS9-distal	3.15	3.45		3.11	3.19
0	LIPUS10-proxy	2.22	2.38		2.21	2.225
0	LIPUS10-distal	13.78	14.43		13.86	13.92
1	LIPUS11-proxy	-0.21	-0.39		-0.21	-0.21
1	LIPUS11-distal	10.21	10		10.17	10.25
1	LIPUS12-proxy	12.24	11.88		12.39	12.09
1	LIPUS12-distal	5.87	5.71		5.83	5.91
0	LIPUS13-proxy	1.49	1.84		1.45	1.53
0	LIPUS13-distal	1.71	1.91		1.66	1.76
1	LIPUS14-proxy	4.05	4.22		4.06	4.04
1	LIPUS14-distal	0.79	0.88		0.74	0.835
0	LIPUS15-proxy	2.59	2.89		2.47	2.7
0	LIPUS15-distal	5.61	5.29		5.63	5.58
0	LIPUS16-proxy	17.59	17.39		16.54	16.63
0	LIPUS16-distal	7.93	8.24		7.88	7.98

## Sheet: Immunohistology 2
Pig Number	LIPUS	LYVE-1 distal
		/mm2
1	1	5.855
2	1	10.5858
3	0	10.7744
4	0	13.8221
5	1	9.46952
6	0	9.1648
7	1	3.34955
8	0	6.79028
9	1	1.86856
10	0	3.77736
11	1	1.72511
12	1	2.426
13	0	1.92258
14	1	3.06996
15	0	2.36849
16	0	7.2823
